# Supplementary material
Source: publisher figshare collection journal article supplement (https://acs.figshare.com/ndownloader/files/21814380)
Supplement: Supplementary file 1 [file 21814380]

**Heat Transfer and Fluid Flow Characteristics for Newtonian and Non-Newtonian Fluids in a Tube-in-Tube Helical Coil Heat Exchanger**

Naveen Kushwaha<sup>1</sup>, Tara Chand Kumawat<sup>1</sup>, Krishna Deo Prasad Nigam<sup>2</sup>, Vimal Kumar<sup>1,\*</sup>

<sup>1</sup>Department of Chemical Engineering, Indian Institute of Technology Roorkee,  
Uttarakhand – 247667, India

<sup>2</sup>Department of Chemical Engineering, Indian Institute of Technology Delhi,  
Delhi–247667, India

## Supporting Information

- Variation of heat transfer performance parameter ( $\eta = Nu_{with\ baffles}/Nu_{without\ baffles}$ ) in parallel and counter flow configurations

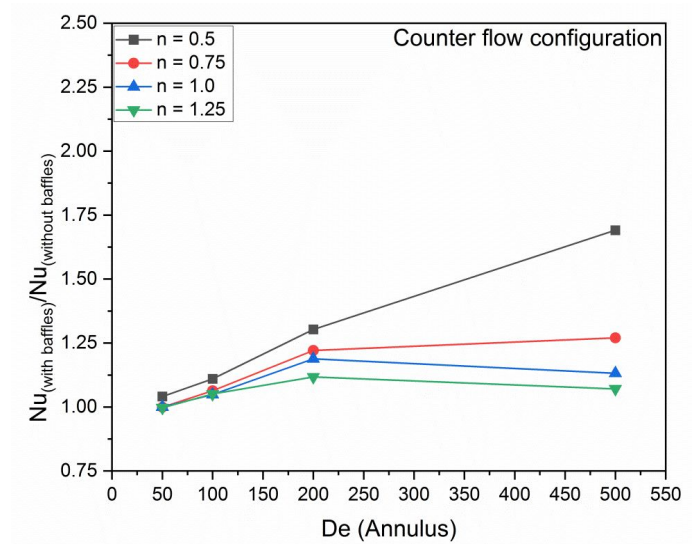

(a)

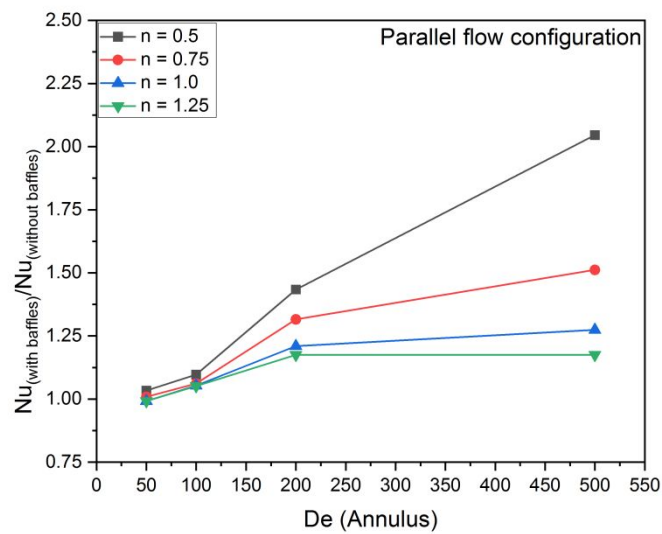

(b)

**Figure S1** Heat transfer performance versus annulus Dean number in (a) counter and (b) parallel flow configurations.
